# Supplementary material
Source: Springer Nature journal article supplement (https://www.springermedizin.de/resource/supplementary/12890_2014_562_MOESM3_ESM.pdf/9505316)
Supplement: MOESM3 [file 9505316]

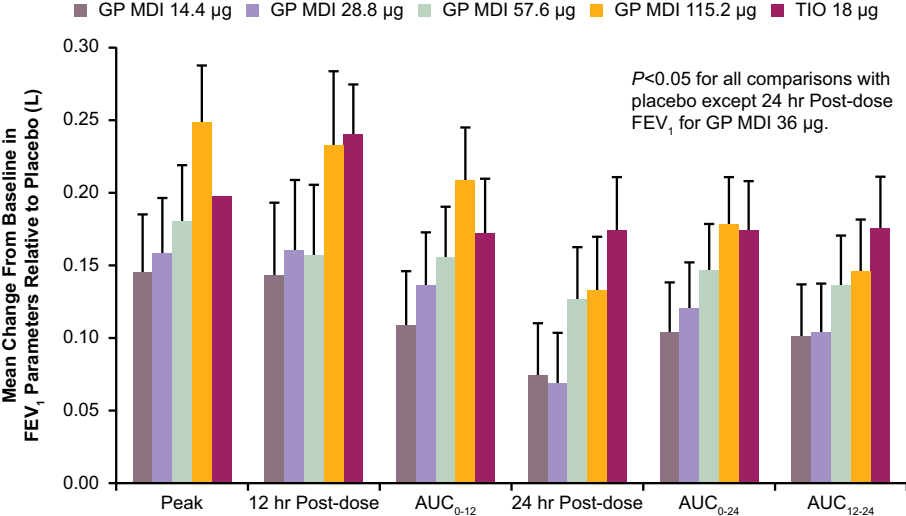

AUC<sub>x-y</sub> = area under the forced expiratory volume in 1 second curve from time x to time y post study-drug;  
 FEV<sub>1</sub> = forced expiratory volume in 1 second; GP MDI = glycopyrronium metered-dose inhaler; L = liter.
